# Supplementary material
Source: PubMed Central journal article supplement (PMC7610556)
Supplement: EMS118329-supplement-Supplementary_Information.pdf [file EMS118329-supplement-Supplementary_Information.pdf]

# Supplementary Information

## *Diminishing returns drive altruists to help extended family*

Methods, analyses, and description of data collection are provided in the main text Methods section. In this Supplementary Information, we provide additional detail. Supplementary figures are provided in the Extended Data.

### Contents

|                                                                  |          |
|------------------------------------------------------------------|----------|
| 1. <b>Notation</b> .....                                         | <b>2</b> |
| 2. <b>Supplementary information for Taylor-Frank model</b> ..... | <b>4</b> |
| 3. <b>Additional statistics information</b> .....                | <b>5</b> |
| 4. <b>Work cited</b> .....                                       | <b>6</b> |

The following files are included as other supplementary data and code:

1. “*Model.R*” – R script for MCMC
2. “*intercept inits.txt*” – example initial values of intercepts
3. “*e array.txt*” – transitions data used in the model file
4. “*CovariatesData.txt*” – covariates data used in the model file
5. “*Mathematica Fig. 3.nb*” – Mathematica file for construction of Main Text Figure 3
6. “*MATLAB – Haplodiploid spatial simulation*” – MATLAB code for the individual-based model

# 1. Notation

Full description is provided in Section 1 of Methods. Tables of notation are provided below.

| Table S1: Notation in theoretical models |                              |                                                                                                                                                                                                                             |
|------------------------------------------|------------------------------|-----------------------------------------------------------------------------------------------------------------------------------------------------------------------------------------------------------------------------|
| Symbol                                   | Model                        | Definition                                                                                                                                                                                                                  |
| $G_i$                                    | <i>Bet-hedging maximand</i>  | Genetic value for individual $i$ , with population average $\bar{G}$                                                                                                                                                        |
| $I_i$                                    | "                            | Absolute inclusive fitness of individual $i$ . The total number of offspring-equivalents produced by individual $i$ 's actions.                                                                                             |
| $b_{ijt}$                                | "                            | Additive effect of actor $i$ on the absolute fitness of individual $j$ in context ('role') $t$                                                                                                                              |
| $\bar{w}$                                | "                            | Population average absolute fitness (reproductive success)                                                                                                                                                                  |
| $\frac{I_i}{\bar{w}}$                    | "                            | 'Relative inclusive fitness' of Grafen <sup>1</sup>                                                                                                                                                                         |
| $\omega$                                 | "                            | State of the population, in the set $\Omega$                                                                                                                                                                                |
| $\mathbb{E}_\omega[I_i]$                 | "                            | Expected absolute inclusive fitness, $\mathbf{q}^\dagger \boldsymbol{\mu}$                                                                                                                                                  |
| $v$                                      | "                            | Coefficient of variation in population average reproductive success $\left(\frac{\sigma_\omega[\bar{w}]}{\mathbb{E}_\omega[\bar{w}]}\right)$ . $v$ functions as risk-aversion in the bet-hedging trade-offs of an organism. |
| $\rho$                                   | "                            | Correlation, across states $\Omega$ , between $I_i$ and $\bar{w}$ ( $\rho_{I_i, \bar{w}}$ )                                                                                                                                 |
| $\sigma_\omega[I_i]$                     | "                            | Standard deviation of $I_i$ , $\sqrt{\mathbf{q}^\dagger \mathbf{C} \mathbf{q}}$                                                                                                                                             |
| $\mathbf{C}$                             | "                            | Variance-covariance matrix for the payoff rates of different investments made by a focal actor                                                                                                                              |
| $\mathbf{q}$                             | "                            | Vector of investment weights placed on different behaviours by a focal individual                                                                                                                                           |
| $\boldsymbol{\mu}$                       | "                            | Vector of expected payoff rates from each behaviour choice, in terms of the expected number of offspring-equivalents produced per unit invested                                                                             |
| $\mathbf{1}$                             | "                            | Vector of 1s                                                                                                                                                                                                                |
| $\dagger$                                | "                            | Transpose                                                                                                                                                                                                                   |
| $\alpha$                                 | <i>Bet-hedging</i>           | Probability with which individuals are automatically paired with a genetically identical partner                                                                                                                            |
| $N$                                      | <i>population size model</i> | Population size (since this model uses haploid asexuals, this is the number of 'queens')                                                                                                                                    |
| $p$                                      | "                            | Frequency of mutant allele                                                                                                                                                                                                  |
| $n_1$                                    | "                            | Number of workers on colony type 1                                                                                                                                                                                          |
| $n_2$                                    | "                            | Number of workers on colony type 2, where $n_2 < n_1$                                                                                                                                                                       |
| $n_j$                                    | "                            | Number of workers on a colony belonging to queen $j$                                                                                                                                                                        |
| $\bar{y}$                                | "                            | Resident drifting level (proportion of effort invested from a type 1 colony to a type 2 colony)                                                                                                                             |
| $A$                                      | "                            | Constant determining the effect on queen fitness of adding additional workers                                                                                                                                               |
| $\theta$                                 | "                            | Independent probability of a catastrophe occurring on a given colony                                                                                                                                                        |
| $k$                                      | "                            | Effect of catastrophe occurring. If a catastrophe occurs on her colony, a queen's absolute fitness is reduced to a proportion $k$ of the value it would otherwise have.                                                     |
| $w_j$                                    | "                            | Absolute fitness (reproductive success) of queen $j$ ( $w_j = An_j$ )                                                                                                                                                       |
| $w$                                      | "                            | Absolute fitness of a queen carrying the mutant allele. $w$ can take the values $w_2$ , $w_1$ , $kw_2$ , and $kw_1$                                                                                                         |
| $w_2$                                    | "                            | Absolute fitness of a queen carrying the mutant allele on a low-worker number colony on which no catastrophe occurs                                                                                                         |
| $w_1$                                    | "                            | Absolute fitness of a queen carrying the mutant allele on a high-worker number colony on which no catastrophe occurs                                                                                                        |

|                  |                                                            |                                                                                                                                                                                    |
|------------------|------------------------------------------------------------|------------------------------------------------------------------------------------------------------------------------------------------------------------------------------------|
| $w_{\text{♀},s}$ | <i>Indirect reciprocity and diminishing returns models</i> | Absolute fitness of an individual if it develops as female on a focal nest of type $s$                                                                                             |
| $w_{\text{♂},s}$ |                                                            | Absolute fitness of an individual if it develops as male on a focal nest of type $s$                                                                                               |
| $\bar{w}$        |                                                            | Population average absolute fitness                                                                                                                                                |
| $W$              | "                                                          | Relative fitness ( $\frac{w}{\bar{w}}$ )                                                                                                                                           |
| $z$              | "                                                          | Sex ratio (proportion of eggs that are male), with population average $\bar{z}$                                                                                                    |
| $x$              | "                                                          | Probability with which a focal individual develops as a sterile helper, with population average $\bar{x}$                                                                          |
| $y$              | "                                                          | Probability with which a focal individual invests its finite helping effort in a partner colony ('drifting level'), with population average $\bar{y}$                              |
| $Y_f$            | "                                                          | Average value of trait $y$ among members of a focal individual's colony                                                                                                            |
| $Y_d$            | "                                                          | Average value of trait $y$ among members of a donor colony to a focal individual's colony                                                                                          |
| $K_j$            | "                                                          | Probability that individual $j$ survives to reproductive maturity, given that they are a potential reproductive (i.e., not a sterile helper). $\bar{K}$ is the population average. |
| $h$              | "                                                          | Amount of help received during development                                                                                                                                         |
| $p$              | "                                                          | Consanguinity                                                                                                                                                                      |
| $c_{\text{♀}}$   | "                                                          | Class reproductive value for females. For haplodiploids, $c_{\text{♀}} = \frac{2}{3}$                                                                                              |
| $c_{\text{♂}}$   | "                                                          | Class reproductive value for males. For haplodiploids, $c_{\text{♂}} = \frac{1}{3}$                                                                                                |
| $m$              | "                                                          | Willingness to accept drifters, with population average $\bar{m}$                                                                                                                  |
| $M_r$            | "                                                          | Average value of trait $m$ on a recipient colony to a focal individual's colony                                                                                                    |
| $M_f$            | "                                                          | Average value of trait $m$ among members of a focal individual's colony                                                                                                            |
| $u$              | "                                                          | Correction factor for social heterosis. Help directed at an unrelated partner colony is amplified by a coefficient $u$ .                                                           |
| $a$              | "                                                          | Effect of help at home. Help directed at a worker's own home colony is amplified by a coefficient $a$ .                                                                            |
| $\psi$           | "                                                          | Worker-to-brood ratio, which we assume to be $0 \leq \psi \leq 1$ .                                                                                                                |
| $T$              | "                                                          | Intensity of diminishing returns. Returns to cooperation are linear when $T = 1$ . Higher values of $T$ lead to stronger diminishing returns.                                      |
| $\beta$          | "                                                          | Constraint in model forcing $m = \beta y$                                                                                                                                          |
| $d_{\text{♀}}$   | "                                                          | Consanguinity to foreign female brood on a partner nest as a proportion of consanguinity to sister brood on the home nest                                                          |
| $d_{\text{♂}}$   | "                                                          | Consanguinity to foreign male brood on a partner nest as a proportion of consanguinity to brother brood on the home nest                                                           |
| $d$              | "                                                          | Value in Equation 3 of the main text, where we assume consanguinities to male and female brood are devalued to the same proportion, $d_{\text{♀}} = d_{\text{♂}} = d$              |

## 2. Supplementary information for Taylor-Frank model

For the indirect reciprocity and diminishing returns analyses, we consider a haplodiploid population and follow the framework for the evolution of eusociality in Davies *et al.*<sup>2</sup>, which we summarise below. Notation is in **Table S1**. See Sections 2 and 3 of Methods respectively for descriptions.

Daughters become reproductives with probability  $1 - x$  and workers with probability  $x$ . We therefore refer to  $x$  as the level of altruistic sterility.

We assume common sex ratio ( $z$ ) and sterility ( $x$ ) values for all colonies in the population. The absolute fitness of a female developing on colony type  $s$  is:

$$w_{\text{♀},s} = (1 - x)K_s \quad (\text{S2.1})$$

where  $K_s$  is the probability of surviving to reproductive maturity for a potential reproductive developing on colony type  $s$ . We allow the fitness of a reproductive to follow a diminishing returns curve:

$$K_s = 1 - (1 - h_s)^T \quad (\text{S2.2})$$

where  $h_s$  denotes level of help experienced by brood on nest type  $s$  during its development. When there are no diminishing returns ( $T = 1$ ),  $K_s = h_s$ . Higher values of  $T$  generate stronger diminishing returns.

The absolute fitness of a male developing on colony type  $s$  depends on the ratio of reproductive females to males:

$$w_{\text{♂},s} = \frac{(1 - \bar{z})(1 - \bar{x})}{z} K_s \quad (\text{S2.3})$$

where  $z$  is the population average sex ratio and  $x$  is the population average altruistic sterility.

Female and male relative fitnesses ( $W_{\text{♀},s} = \frac{w_{\text{♀},s}}{\bar{w}_{\text{♀}}}$  and  $W_{\text{♂},s} = \frac{w_{\text{♂},s}}{\bar{w}_{\text{♂}}}$ , respectively) simplify to  $W_{\text{♀},s} = W_{\text{♂},s} = \frac{K_s}{\bar{K}}$ . Assuming two nest types ( $s = \{1,2\}$ ) of equal frequency in the population, relative fitness is  $\frac{2K_s}{\bar{K}_1 + \bar{K}_2}$ , where  $\bar{K}_1$  and  $\bar{K}_2$  are the average probabilities of survival to reproductive maturity on nests of each type respectively.

Selection favours an increase in a trait value  $y$  if an increase in  $y$  is associated with higher fitness overall, considering effects on female and male fitnesses<sup>2</sup>:

$$c_{\text{♀}} \frac{dW_{\text{♀}}}{dy} + c_{\text{♂}} \frac{dW_{\text{♂}}}{dy} > 0 \quad (\text{S2.4})$$

where  $c_{\text{♀}}$  and  $c_{\text{♂}}$  are, respectively, the class reproductive values of females and males (the relative contribution of each sex to the gene pool of the distant future). Class reproductive values in haplodiploids are  $c_{\text{♀}} = \frac{2}{3}$  for females and  $c_{\text{♂}} = \frac{1}{3}$  for males. Following the Taylor-Frank method<sup>3</sup>, we expand the derivatives using the chain rule, as for instance:

$$\frac{dW_i}{dy_i} = \sum_j \frac{\partial W_i}{\partial y_j} \cdot \frac{dy_j}{dy_i} \quad (\text{S2.5})$$

where  $j$  denotes the actor role,  $i$  the recipient female, and  $y$  a genic value for a trait of interest (for trait value, we assume 1:1 genotype:phenotype mapping). In inclusive fitness models<sup>4</sup>, the second fraction on the right hand side is regression relatedness ( $r$ ). We follow Davies *et al.*<sup>2</sup> in writing conditions for selection

in terms of consanguinities ( $p$ , the probability that randomly-chosen alleles at the focal locus in individuals  $j$  and  $i$  are identical by shared genealogy<sup>5</sup>), rather than regression relatedness ( $r$ ):

$$r_{ji} = \frac{dy_j}{dy_i} = \frac{p_{ji}}{p_{ii}} \quad (S2.6)$$

where  $p_{ji}$  is the consanguinity between  $j$  and  $i$ . The relevant consanguinity values for haplodiploids given in **Table S2** (see Table S1 of Davies *et al.*<sup>2</sup> for a list of consanguinity values in diploids and haplodiploids; see also Appendix B of Alpedrinha *et al.*<sup>6</sup>).

| Consanguinity       | Value |
|---------------------|-------|
| $p_{\text{sis}}$    | 3/8   |
| $p_{\text{niece}}$  | 3/16  |
| $p_{\text{bro}}$    | 1/4   |
| $p_{\text{nephew}}$ | 3/8   |

### 3. Additional statistics information

**Table S3: Mean residual deviance for each of the seven starting states and the aggregate model**

|                                                                                   | Total   | $n_i$ | Mean residual deviance |
|-----------------------------------------------------------------------------------|---------|-------|------------------------|
| Total residual deviance for entire fitted model (totresdev)                       | 33551.9 | 24    | 2.97                   |
| Total residual deviance for intercepts-only model (totresdevIO)                   | 71522.7 | 24    | 6.33                   |
| Total residual deviance for intercepts + random effects only model (totresdevREO) | 47048.2 | 24    | 4.16                   |
| totresdevimodel[1]                                                                | 10561.3 | 5     | 4.48                   |
| totresdevimodel[2]                                                                | 5350.2  | 5     | 2.27                   |
| totresdevimodel[3]                                                                | 4863.7  | 4     | 2.58                   |
| totresdevimodel[4]                                                                | 4591.6  | 3     | 3.25                   |
| totresdevimodel[5]                                                                | 1264.8  | 3     | 0.90                   |
| totresdevimodel[6]                                                                | 4250.9  | 2     | 4.51                   |
| totresdevimodel[7]                                                                | 2669.3  | 2     | 2.83                   |

#### 4. Work cited

1. Grafen, A. Optimization of inclusive fitness. *J. Theor. Biol.* **238**, 541–563 (2006).
2. Davies, N. G., Ross, L. & Gardner, A. The ecology of sex explains patterns of helping in arthropod societies. *Ecol. Lett.* **19**, 862–872 (2016).
3. Taylor, P. & Frank, S. How to make a kin selection model. *J. Theor. Biol.* **180**, 27–37 (1996).
4. Alpedrinha, J., Gardner, A. & West, S. A. Haplodiploidy and the evolution of eusociality: Worker revolution. *Am. Nat.* **184**, 303–317 (2014).
5. Bulmer, M. *Theoretical Evolutionary Ecology*. (Sinauer Associates, 1994).
6. Alpedrinha, J., West, S. A. & Gardner, A. Haplodiploidy and the evolution of eusociality: worker reproduction. *Am. Nat.* **182**, 421–438 (2013).
